# Supplementary material for: Interesting chemical and physical features of the products of the reactions between trivalent lanthanoids and a tetradentate Schiff base derived from cyclohexane-1,2-diamine
Source: Royal Society of Chemistry journal article supplement (doi:10.1039/d3dt00817g), 2023-01-01
Supplement: d3dt00817g1.pdf [file d3dt00817g1.pdf]

## ELECTRONIC SUPPLEMENTARY INFORMATION (ESI)

**Interesting chemical and physical features in the products of the reactions  
between trivalent lanthanoids and a tetradentate Schiff base derived from  
cyclohexane-1,2-diamine <sup>+</sup>**

Ioannis Mylonas-Margaritis,<sup>\*a</sup> Zoi G. Lada<sup>b</sup>, Alexandros A. Kitos,<sup>a</sup> Diamantoula  
Maniaki,<sup>a</sup> Katerina Skordi,<sup>c</sup> Anastasios J. Tasiopoulos,<sup>c</sup> Vlasoula Bekiari,<sup>d</sup> Albert  
Escuer,<sup>e</sup> Julia Mayans,<sup>\*e</sup> Vassilios Nastopoulos,<sup>\*a</sup> Evangelos G. Bakalbassis,<sup>\*f</sup>  
Dionissios Papaioannou<sup>\*a</sup> and Spyros P. Perlepes<sup>\*a, b</sup>

<sup>a</sup> Department of Chemistry, University of Patras, 26504 Patras, Greece.

E-mail: [ioanismylonasmargaritis@gmail.com](mailto:ioanismylonasmargaritis@gmail.com); [dapapaio@upatras.gr](mailto:dapapaio@upatras.gr); [nastopoulos@upatras.gr](mailto:nastopoulos@upatras.gr); [perlepes@upatras.gr](mailto:perlepes@upatras.gr)

<sup>b</sup> Institute of Chemical Engineering Sciences (ICE-HT), Foundation for Research and Technology-Hellas (FORTH), P.O. Box 1414, Platani, 26504 Patras, Greece

<sup>c</sup> Department of Chemistry, University of Cyprus, 1678 Nicosia, Cyprus

<sup>d</sup> Department of Agriculture, University of Patras, 26504 Patras, Greece

<sup>e</sup> Departament de Química Inorgànica i Orgànica, Secio Inorgànica and Institute of Nanoscience (IN2UB) and Nanotechnology, Universitat de Barcelona, Martí i Franques 1-11, 08028 Barcelona, Spain. E-mail: [julia.mayans@qi.ub.edu](mailto:julia.mayans@qi.ub.edu)

<sup>f</sup> Department of Chemistry, Aristotle University of Thessaloniki, University Campus, 54124 Thessaloniki, Greece. E-mail: [bakalbas@chem.auth.gr](mailto:bakalbas@chem.auth.gr)

**Table S1** Crystallographic data for compounds **1**, **3**, **5**, **6** and **8**

| Parameter                                                                   | <b>1</b>                                                         | <b>3</b>                                                         | <b>5</b>                                                         | <b>6</b>                                                         | <b>8</b>                                                         |
|-----------------------------------------------------------------------------|------------------------------------------------------------------|------------------------------------------------------------------|------------------------------------------------------------------|------------------------------------------------------------------|------------------------------------------------------------------|
| Chemical formula                                                            | C <sub>23</sub> H <sub>32</sub> PrN <sub>5</sub> O <sub>12</sub> | C <sub>23</sub> H <sub>32</sub> SmN <sub>5</sub> O <sub>12</sub> | C <sub>23</sub> H <sub>32</sub> GdN <sub>5</sub> O <sub>12</sub> | C <sub>23</sub> H <sub>32</sub> TbN <sub>5</sub> O <sub>12</sub> | C <sub>23</sub> H <sub>32</sub> HoN <sub>5</sub> O <sub>12</sub> |
| <i>M<sub>r</sub></i>                                                        | 711.44                                                           | 720.88                                                           | 727.78                                                           | 729.45                                                           | 735.46                                                           |
| Crystal size (mm)                                                           | 0.18 x 0.15 x<br>0.12                                            | 0.19 x 0.15 x 0.11                                               | 0.16 x 0.15 x 0.11                                               | 0.17 x 0.15 x 0.10                                               | 0.15 x 0.14 x 0.10                                               |
| Crystal system                                                              | Triclinic                                                        | Triclinic                                                        | Triclinic                                                        | Triclinic                                                        | Triclinic                                                        |
| Space group                                                                 | $\bar{P}1$                                                       | $\bar{P}1$                                                       | $\bar{P}1$                                                       | $\bar{P}1$                                                       | $\bar{P}1$                                                       |
| <i>a</i> /Å                                                                 | 9.0693(5)                                                        | 9.037(4)                                                         | 9.0364(5)                                                        | 9.0184(4)                                                        | 9.0033(8)                                                        |
| <i>b</i> /Å                                                                 | 10.8628(4)                                                       | 10.8222(6)                                                       | 10.8141(5)                                                       | 10.7887(4)                                                       | 10.7752(10)                                                      |
| <i>c</i> /Å                                                                 | 15.4923(8)                                                       | 15.4002(7)                                                       | 15.3789(8)                                                       | 15.3433(8)                                                       | 15.3482(12)                                                      |
| <i>α</i> <sup>o</sup>                                                       | 72.376(4)                                                        | 72.600(4)                                                        | 72.768(4)                                                        | 72.650(4)                                                        | 72.575(8)                                                        |
| <i>β</i> <sup>o</sup>                                                       | 82.650(2)                                                        | 82.703(4)                                                        | 82.691(4)                                                        | 82.897(4)                                                        | 83.019(7)                                                        |
| <i>γ</i> <sup>o</sup>                                                       | 72.893(4)                                                        | 73.013(4)                                                        | 73.102(5)                                                        | 73.220(4)                                                        | 73.246(8)                                                        |
| <i>V</i> /Å <sup>3</sup>                                                    | 1389.01(12)                                                      | 1373.63(12)                                                      | 1372.01(13)                                                      | 1363.11(11)                                                      | 1359.3(2)                                                        |
| <i>T</i> /K                                                                 | 100(2)                                                           | 100(2)                                                           | 100(2)                                                           | 100(2)                                                           | 100(2)                                                           |
| Radiation/ <i>μ</i> (mm <sup>-1</sup> )                                     | Mo Kα/ 1.83                                                      | Mo Kα/ 2.21                                                      | Mo Kα/ 2.49                                                      | Mo Kα/ 2.67                                                      | Cu Kα/ 6.08                                                      |
| No. of reflections<br>measured                                              | 11755                                                            | 11005                                                            | 11951                                                            | 10956                                                            | 8963                                                             |
| No. of independent<br>reflections ( <i>R</i> <sub>int</sub> )               | 5995(0.035)                                                      | 5937(0.035)                                                      | 6070(0.037)                                                      | 6042(0.032)                                                      | 5147(0.032)                                                      |
| No. of observed<br>reflections ( <i>I</i> >2σ( <i>I</i> ))                  | 5314                                                             | 5324                                                             | 5376                                                             | 5537                                                             | 4599                                                             |
| No. of restraints                                                           | 2                                                                | 2                                                                | 2                                                                | 3                                                                | 3                                                                |
| <i>R</i> <sub>1</sub> [ <i>F</i> <sup>2</sup> >2σ( <i>F</i> <sup>2</sup> )] | 0.031                                                            | 0.034                                                            | 0.032                                                            | 0.030                                                            | 0.033                                                            |
| <i>wR</i> <sub>2</sub> ( <i>F</i> <sup>2</sup> )                            | 0.065                                                            | 0.066                                                            | 0.061                                                            | 0.062                                                            | 0.081                                                            |
| Goodness of fit on<br><i>F</i> <sup>2</sup>                                 | 1.04                                                             | 1.06                                                             | 1.03                                                             | 1.06                                                             | 1.07                                                             |
| Δρ <sub>max</sub> /Δρ (e Å <sup>-3</sup> )                                  | 0.81, -0.54                                                      | 1.27, -0.64                                                      | 1.02, -0.69                                                      | 1.38, -0.80                                                      | 0.49, -0.80                                                      |
| CCDC number                                                                 | 2246268                                                          | 2246270                                                          | 2246269                                                          | 2246271                                                          | 2246267                                                          |

**Table S2** Geometry ( $\text{\AA}$ ,  $^\circ$ ) for the H bonds in the crystal structure of complex  $[\text{Pr}(\text{NO}_3)_3(\text{L}'\text{H}_2)(\text{MeOH})]$  (**1**)

| H bond<br>D-H $\cdots$ A <sup>a,b</sup> | D $\cdots$ A | H $\cdots$ A | D-H $\cdots$ A | Symmetry<br>operation of A |
|-----------------------------------------|--------------|--------------|----------------|----------------------------|
| N1-H1 $\cdots$ O1                       | 2.580(3)     | 1.78(3)      | 150(3)         |                            |
| N2-H2 $\cdots$ O2                       | 2.594(3)     | 1.81(3)      | 148(3)         |                            |
| O12-H12 $\cdots$ O11                    | 2.868(3)     | 2.05(3)      | 170(3)         | $-x+1, -y+1, -z+1$         |
| C3-H3 $\cdots$ O7                       | 3.357(4)     | 2.57         | 140            |                            |
| C8-H8A $\cdots$ O10                     | 3.334(4)     | 2.56         | 136            | $x, y+1, z$                |
| C8-H8C $\cdots$ O8                      | 3.331(4)     | 2.43         | 152            | $x-1, y+1, z$              |
| C9-H9B $\cdots$ O8                      | 3.453(4)     | 2.49         | 163            | $x-1, y+1, z$              |
| C6-H16C $\cdots$ O6                     | 3.559(4)     | 2.64         | 157            | $-x+1, -y+1, -z$           |
| C19-H19 $\cdots$ O6                     | 3.280(4)     | 2.54         | 134            |                            |
| C21-H21 $\cdots$ O5                     | 3.429(4)     | 2.66         | 139            | $-x+1, -y+1, -z$           |

<sup>a</sup> Many of the involved non-H atoms have been numbered in Fig. 1.

<sup>b</sup> O5 is the "free" atom of the O3,O4-coordinated nitrate group, O8 is the "free" atom of the O6,O7-coordinated nitrate group, O11 is the "free" atom of the O9,O10-coordinated nitrate group, C8 and C16 are the carbon atoms of the methyl groups, C9 is the aliphatic carbon atom bonded to N1, while C19 and C21 are carbons of the aromatic ring which is connected to O2; these atoms have not been labelled in Fig. 1. D=donor; A=acceptor.

**Table S3** Continuous Shape Measures (CShM) values for the potential coordination polyhedra of the Ln<sup>III</sup> centre in the structures of the complexes [Ln(NO<sub>3</sub>)<sub>3</sub>(L'H<sub>2</sub>)(MeOH)] (Ln = Pr, **1**; Ln = Sm, **3**; Ln = Gd, **5**; Ln = Tb, **6**; Ln = Ho, **8**)<sup>a</sup>

| Ideal coordination polyhedron      | <b>1</b>     | <b>3</b>     | <b>5</b> | <b>6</b> | <b>8</b> |
|------------------------------------|--------------|--------------|----------|----------|----------|
| Enneagon                           | 31.880       | 32.049       | 32.000   | 32.021   | 31.924   |
| Octagonal pyramid                  | 19.084       | 19.259       | 19.268   | 19.409   | 19.457   |
| Heptagonal bipyramid               | 17.987       | 18.155       | 18.166   | 18.167   | 18.075   |
| Johnson triangular cupola          | 13.930       | 13.955       | 13.901   | 13.920   | 13.818   |
| Capped cube                        | 11.307       | 11.181       | 11.125   | 11.060   | 11.147   |
| Spherical-relaxed capped cube      | 10.391       | 10.385       | 10.336   | 10.311   | 10.239   |
| Capped square antiprism            | 3.563        | 3.390        | 3.221    | 3.227    | 3.045    |
| Spherical capped square antiprism  | <b>2.733</b> | <b>2.560</b> | 2.416    | 2.424    | 2.286    |
| Tricapped trigonal prism           | 3.532        | 3.339        | 3.186    | 3.132    | 2.946    |
| Spherical tricapped trigonal prism | 3.001        | 2.973        | 2.867    | 2.829    | 2.715    |

<sup>a</sup>The polyhedron with the CshM value in bold is the real polyhedron of the Ln<sup>III</sup> centre for each compound.

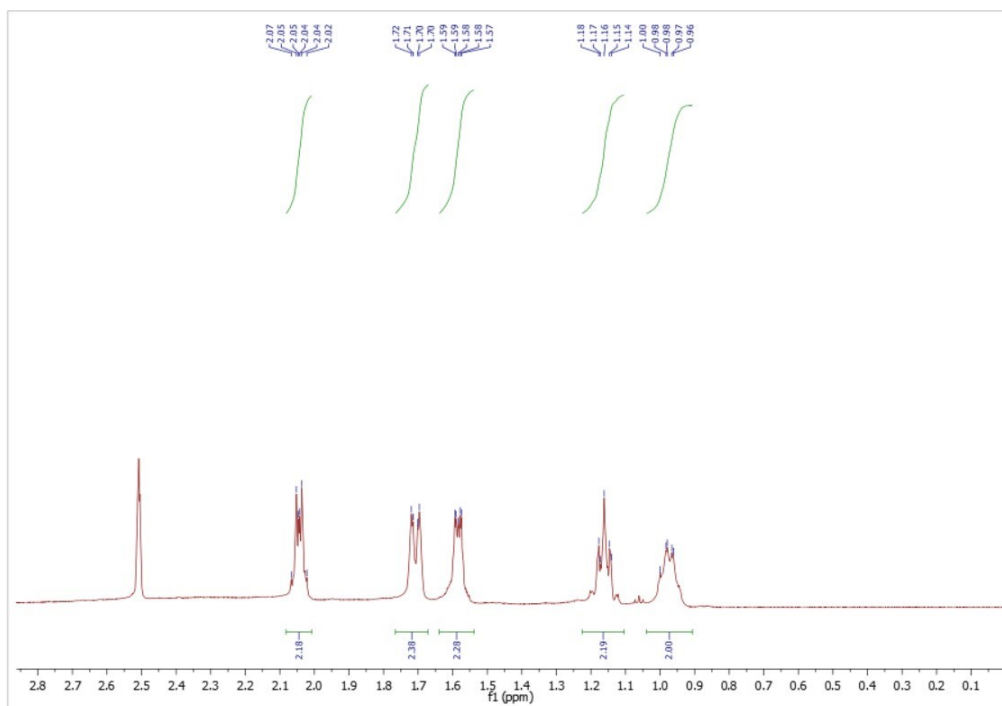

**Fig. S1** The  $^1\text{H}$  NMR spectrum ( $d_6$ -DMSO,  $\delta/\text{ppm}$ ) of ( $\pm$ )-*trans*-1,2-diaminocyclohexane used for the synthesis of  $\text{LH}_2$  (Scheme 1). The signal at  $\delta$  2.52 ppm is due to the non-deuteriated portion of the solvent.

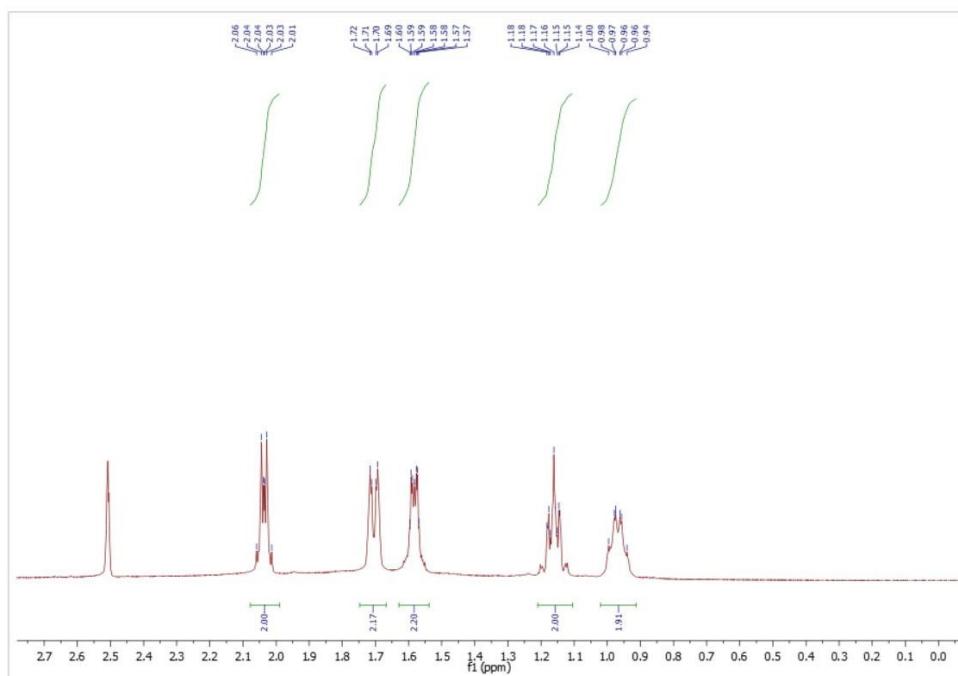

**Fig. S2** The  $^1\text{H}$  NMR spectrum ( $d_6$ -DMSO,  $\delta/\text{ppm}$ ) of (+)-*S,S-trans*-1,2-diaminocyclohexane provided by Fluorochem, CAS: 21436-03-3). The signal at  $\delta$  2.52 ppm is due to the non-deuteriated portion of the solvent.

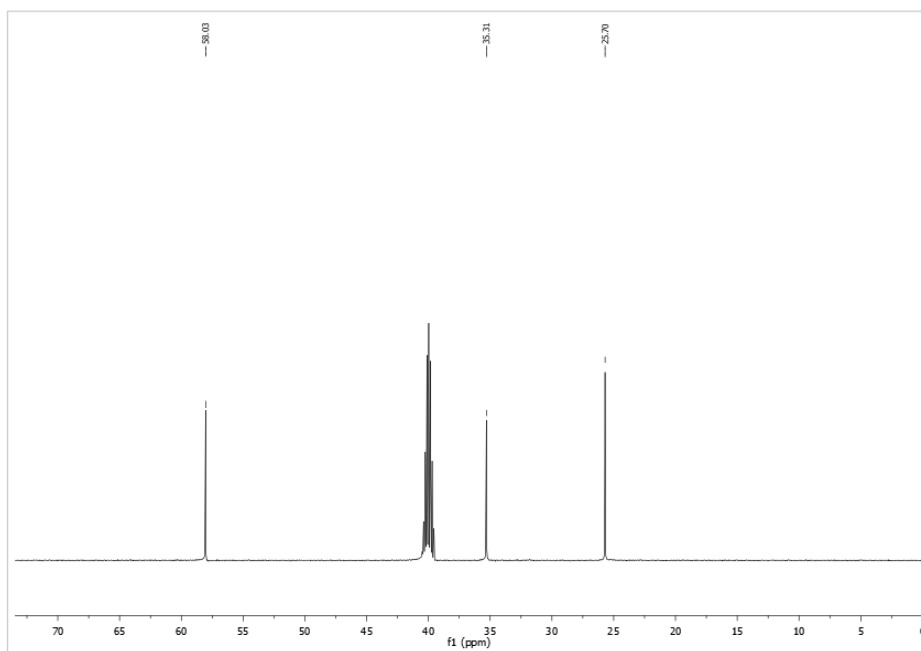

**Fig. S3** The <sup>13</sup>C NMR spectrum (*d*<sub>6</sub>-DMSO,  $\delta$ /ppm) of ( $\pm$ )-*trans*-1,2-diaminocyclohexane used for the synthesis of LH<sub>2</sub> (Scheme 1). The signal at  $\delta \sim 40$  ppm is due to the carbon atoms of the solvent.

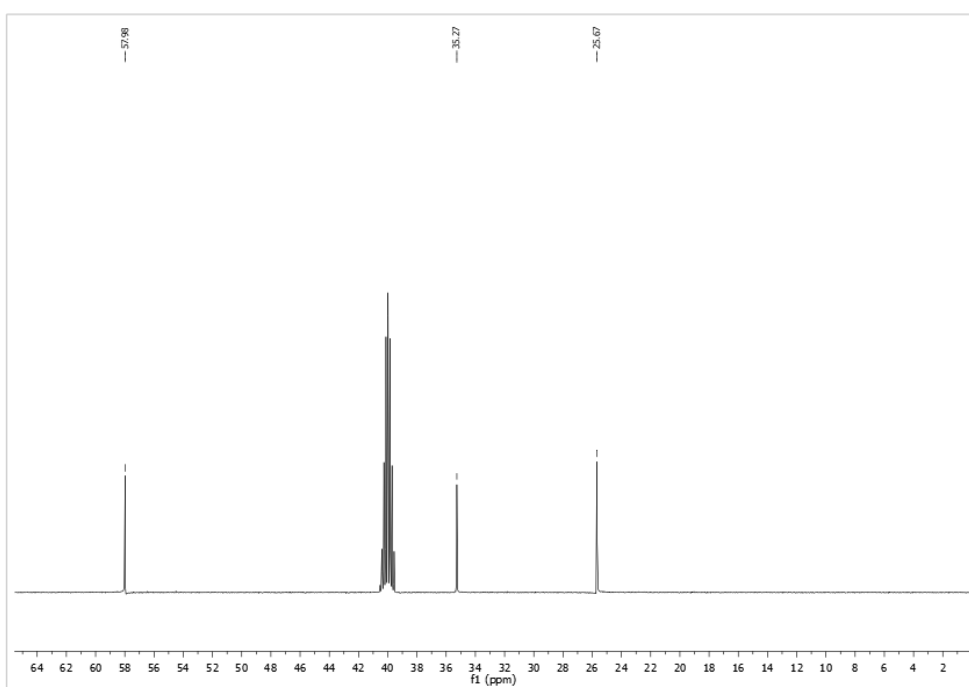

**Fig. S4** The <sup>13</sup>C NMR spectrum (*d*<sub>6</sub>-DMSO,  $\delta$ /ppm) of (-)-*R,R*-*trans*-1,2-diaminocyclohexane provided by Fluorochem, CAS: 20439-47-8). The signal at  $\delta \sim 40$  ppm is due to the carbon atoms of the solvent.

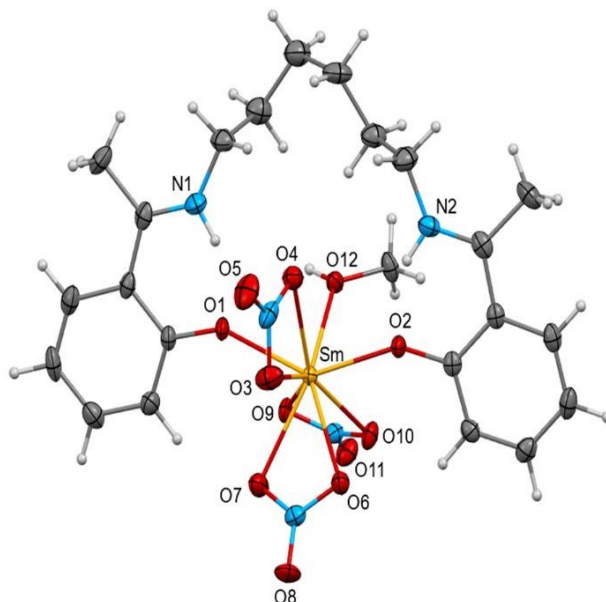

**Fig. S5** Partially labelled plot of the structure of the molecule [Sm(NO<sub>3</sub>)<sub>3</sub>(L'H<sub>2</sub>)(MeOH)] that is present in complex **3**. Thermal ellipsoids are drawn at the 50% probability level. Selected bond lengths (Å): Sm-O1 2.295(2), Sm-O2 2.305(2), Sm-O12 2.451(2), Sm-O(nitrato) 2.481(3)-2.575(2).

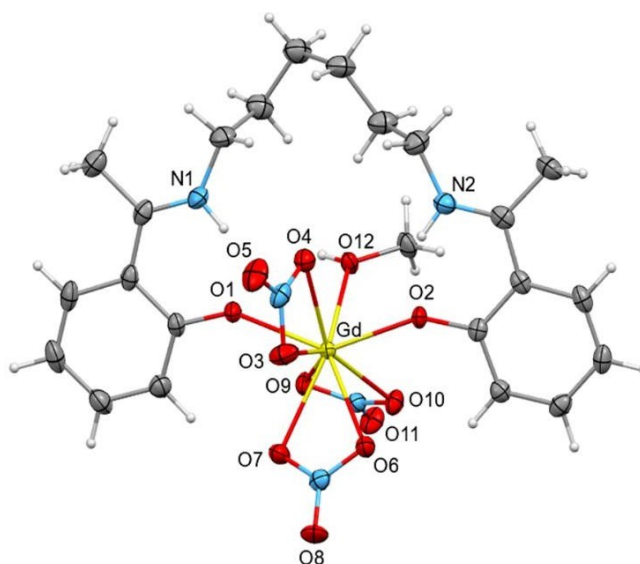

**Fig. S6** Partially labelled plot of the structure of the molecule [Gd(NO<sub>3</sub>)<sub>3</sub>(L'H<sub>2</sub>)(MeOH)] that is present in complex **5**. Thermal ellipsoids are drawn at the 50% probability level. Selected bond lengths (Å): Gd-O1 2.284(2), Gd-O2 2.292(2), Gd-O12 2.423(2), Gd-O(nitrato) 2.453(2)-2.550(2).

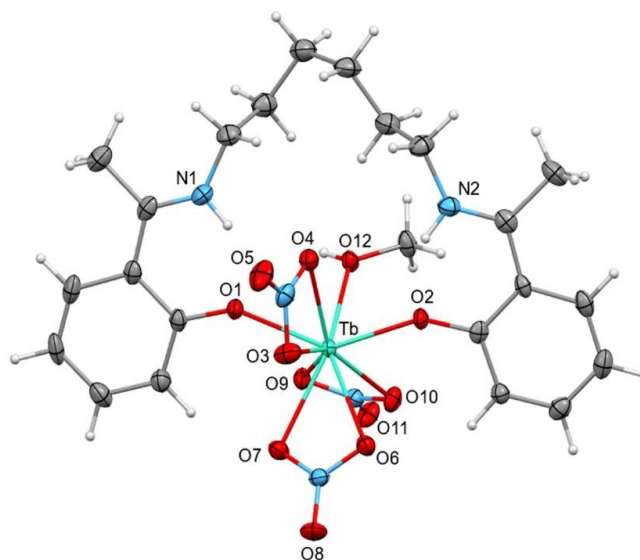

**Fig. S7** Partially labelled plot of the structure of the molecule [Tb(NO<sub>3</sub>)<sub>3</sub>(L'H<sub>2</sub>)(MeOH)] that is present in complex **6**. Thermal ellipsoids are drawn at the 50% probability level. Selected bond lengths (Å): Tb-O1 2.260(2), Tb-O2 2.268(2), Tb-O12 2.409(2), Tb-O(nitrato) 2.442(2)-2.545(2).

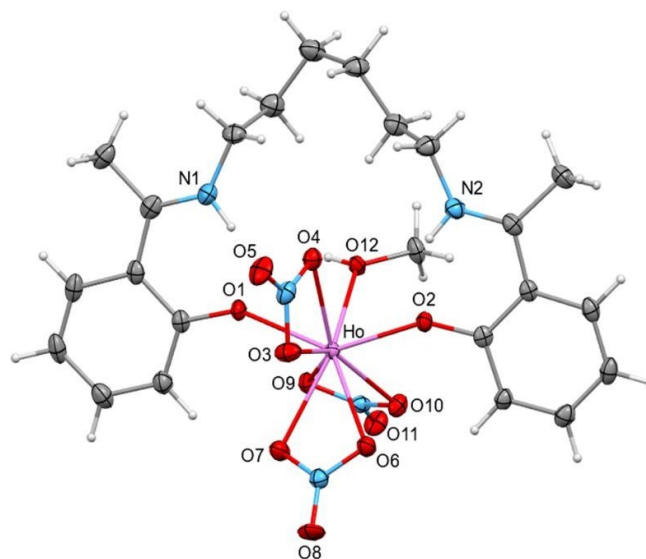

**Fig. S8** Partially labelled plot of the structure of the molecule [Ho(NO<sub>3</sub>)<sub>3</sub>(L'H<sub>2</sub>)(MeOH)] that is present in complex **8**. Thermal ellipsoids are drawn at the 50% level. Selected bond lengths (Å): Ho-O1 2.251(2), Ho-O2 2.252(2), Ho-O12 2.391(2), Ho-O(nitrato) 2.414(2)-2.528(2).



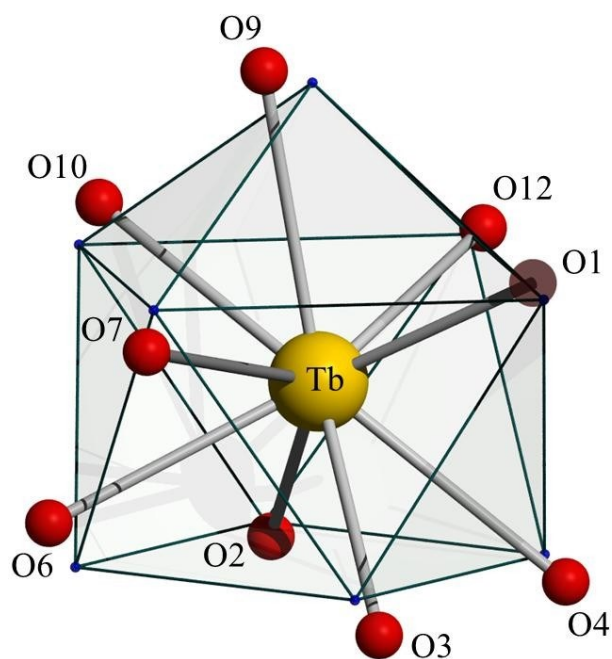

**Fig. S9** The spherical capped square antiprismatic coordination polyhedron of Tb<sup>III</sup> in complex **6**. The very small spheres define the vertices of the ideal polyhedron.

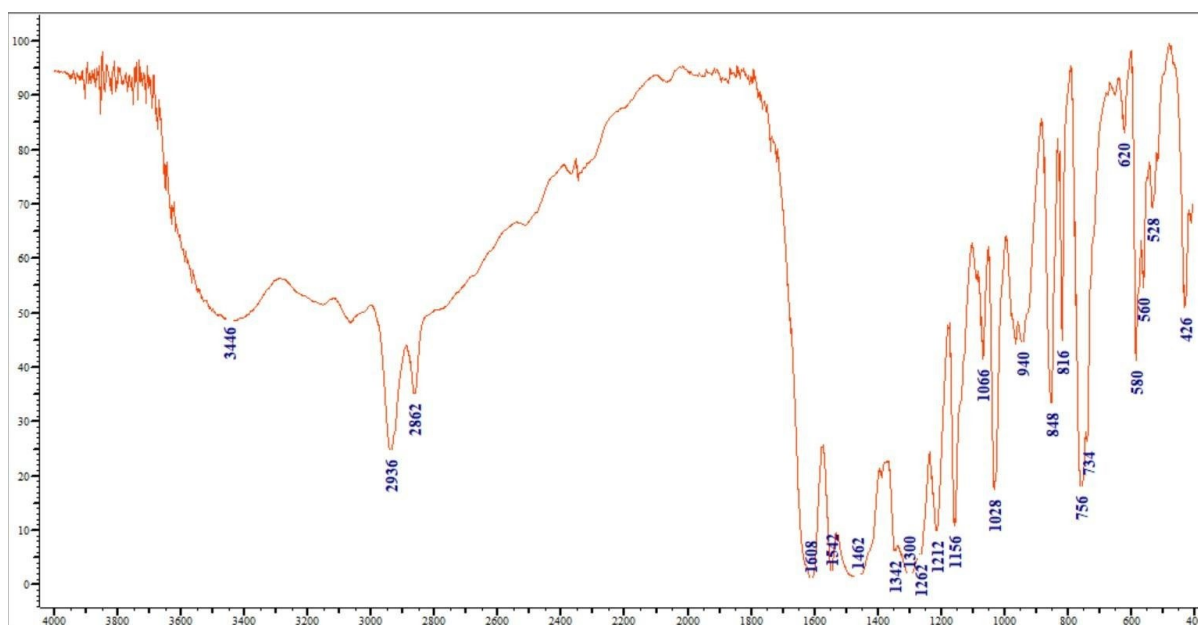

**Fig. S10** The IR spectrum (KBr, cm<sup>-1</sup>) of complex [Pr(NO<sub>3</sub>)<sub>3</sub>(L'H<sub>2</sub>)(MeOH)] (**1**).

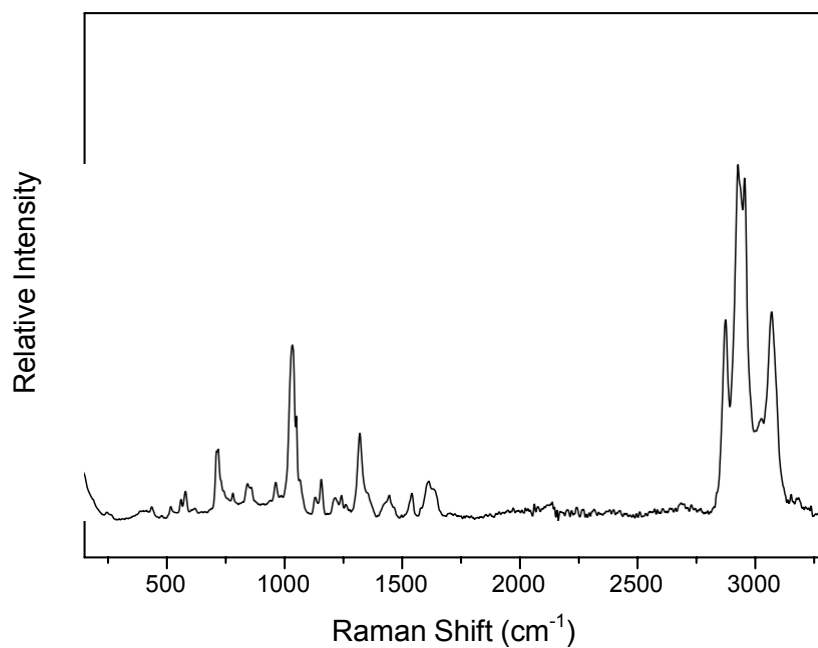

**Fig. S11** The Raman spectrum of solid  $[\text{Dy}(\text{NO}_3)_3(\text{L}'\text{H}_2)(\text{MeOH})]$  (**7**).

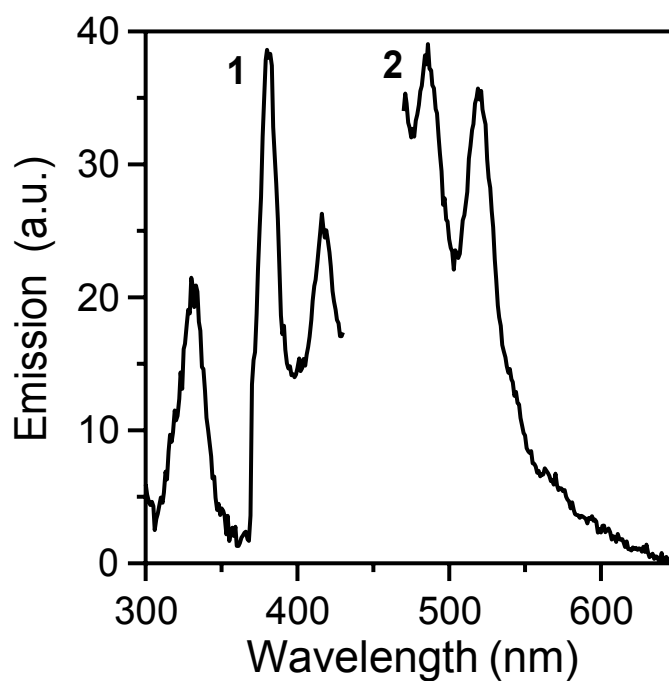

**Fig. S12** Solid-state, room-temperature excitation (curve 1; maximum emission at 486 nm) and emission (curve 2; maximum excitation at 380 nm) spectra of solid  $[\text{Dy}(\text{NO}_3)_3(\text{L}'\text{H}_2)(\text{MeOH})]$  (**7**).

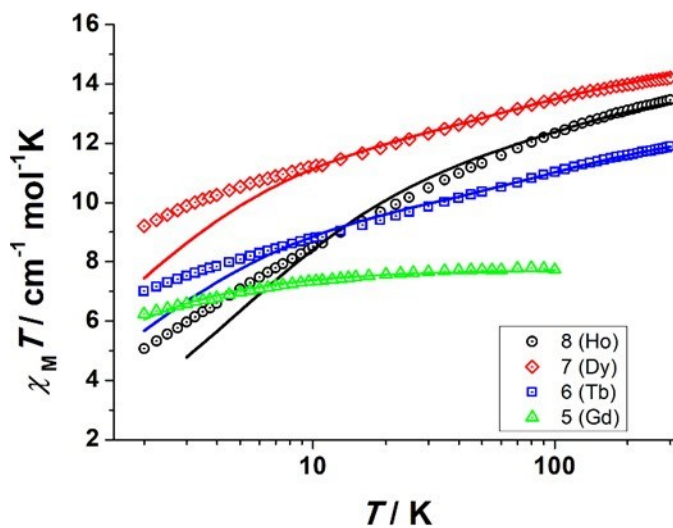

**Fig. S13** Temperature dependence of the  $\chi_M T$  product vs.  $\log(T)$  for compounds 5 (triangles), 6 (squares), 7 (diamonds) and 8 (circles).

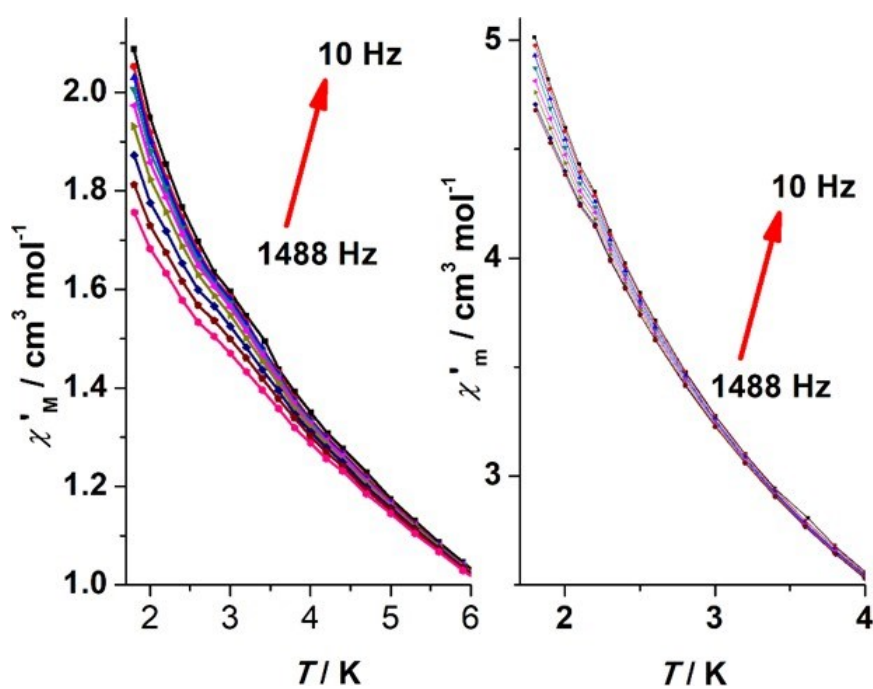

**Fig. S14** In-phase magnetic susceptibility ( $\chi'_M$ ) vs.  $T$  for complexes 5 (left) and 7 (right).

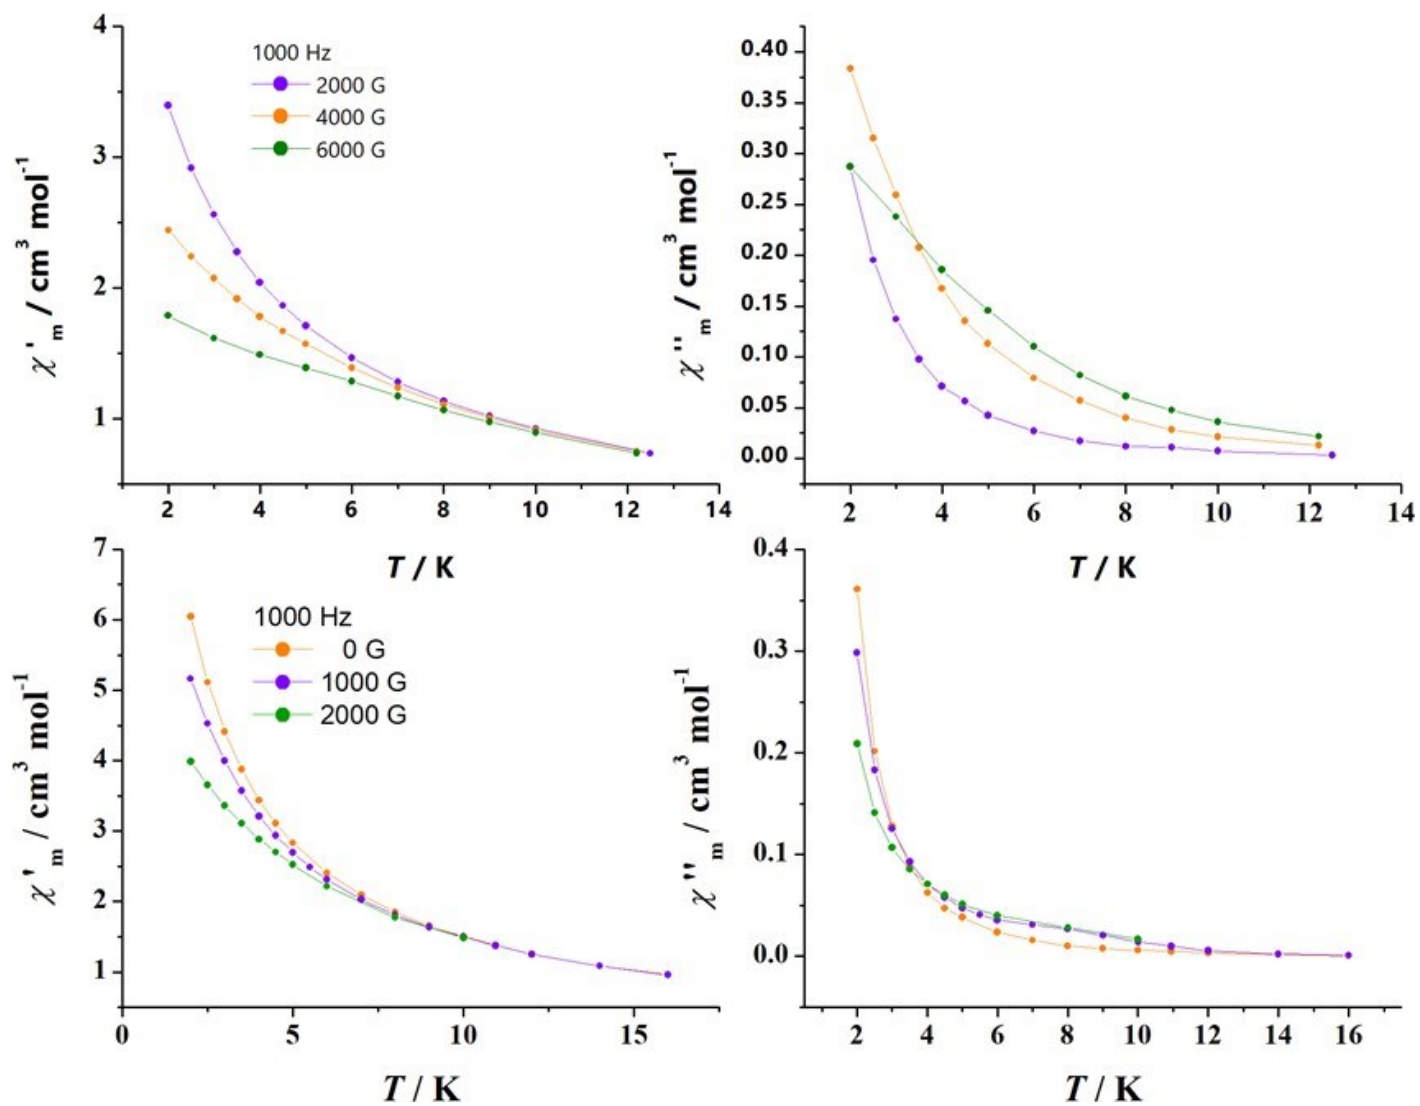

**Fig. S15** Ac plots under various external fields, at a constant frequency of 1000 Hz, for complexes **5** (top) and **7** (bottom).

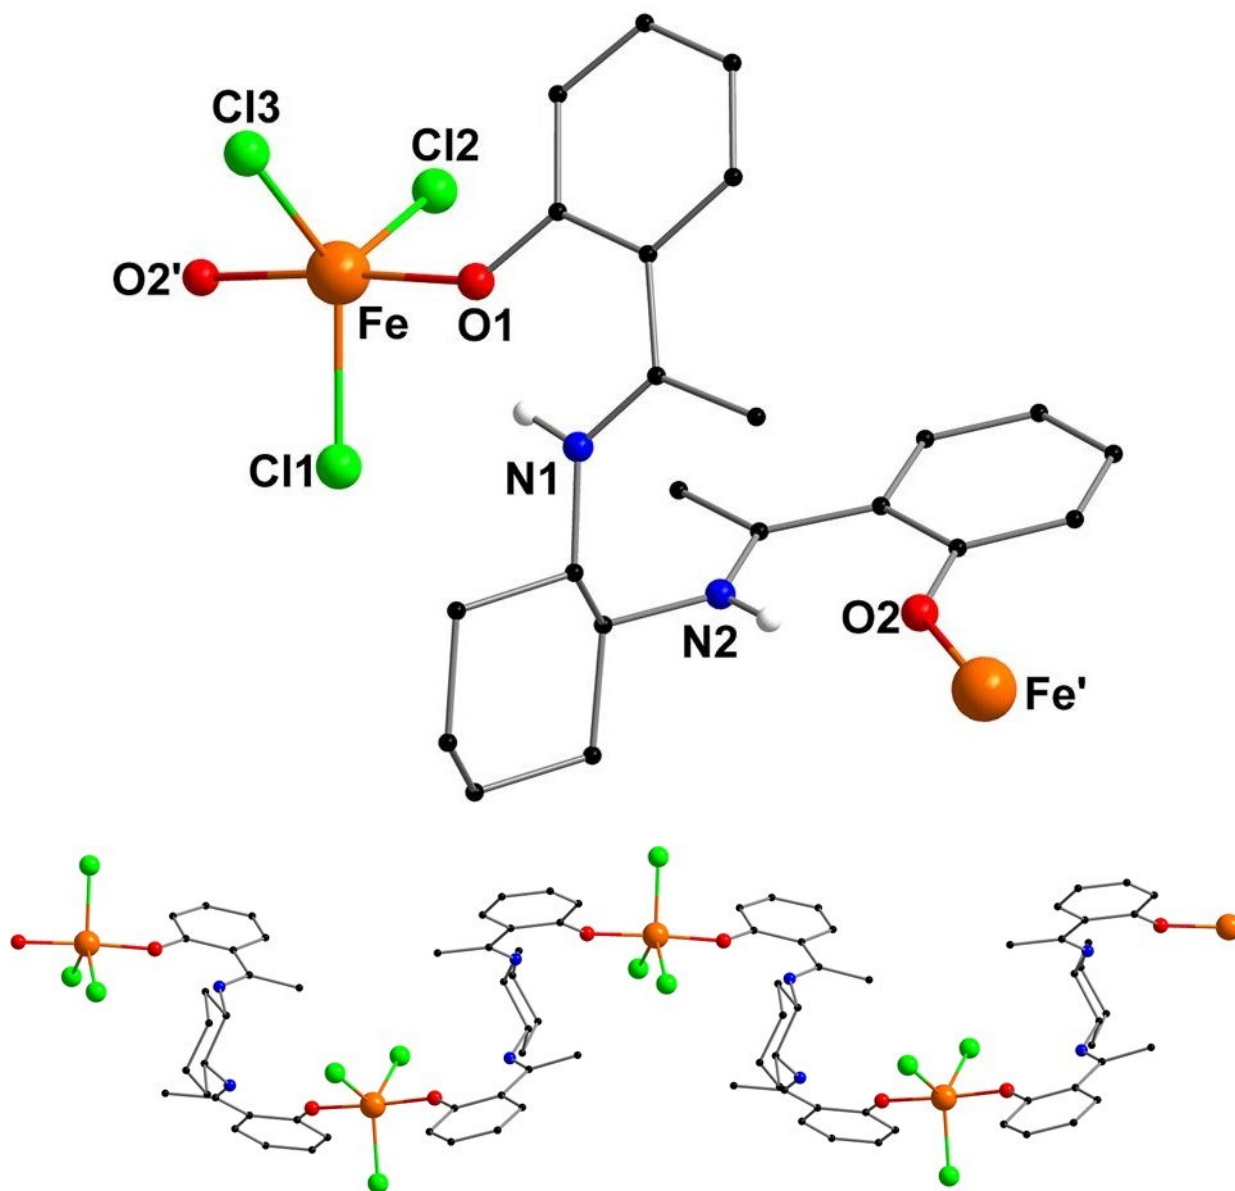

**Fig. S16** (Top) The asymmetric unit and (bottom) a small portion of the 1-D chain of  $\{[\text{Fe}^{\text{III}}\text{Cl}_3(\text{LH}_2)] \cdot \text{Et}_2\text{O}\}_n$ .

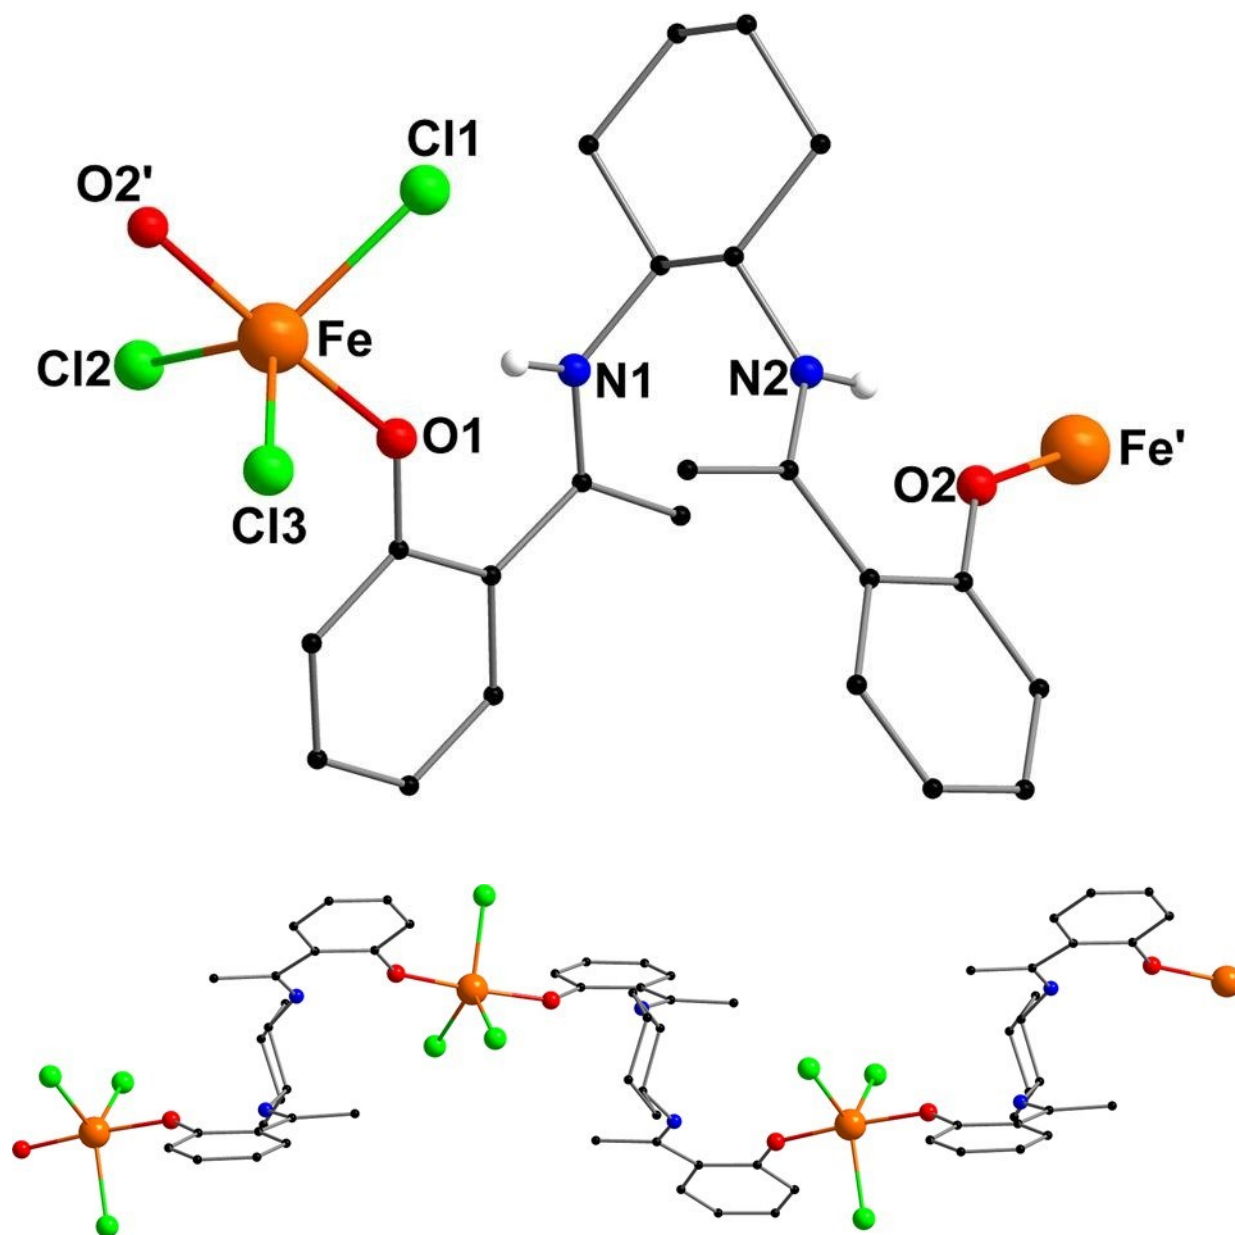

**Fig. S17** (Top) The asymmetric unit and (bottom) a small portion of the 1-D chain of  $\{[\text{Fe}^{\text{III}}\text{Cl}_3(\text{LH}_2)] \cdot 2\text{Me}_2\text{CO}\}_n$ .

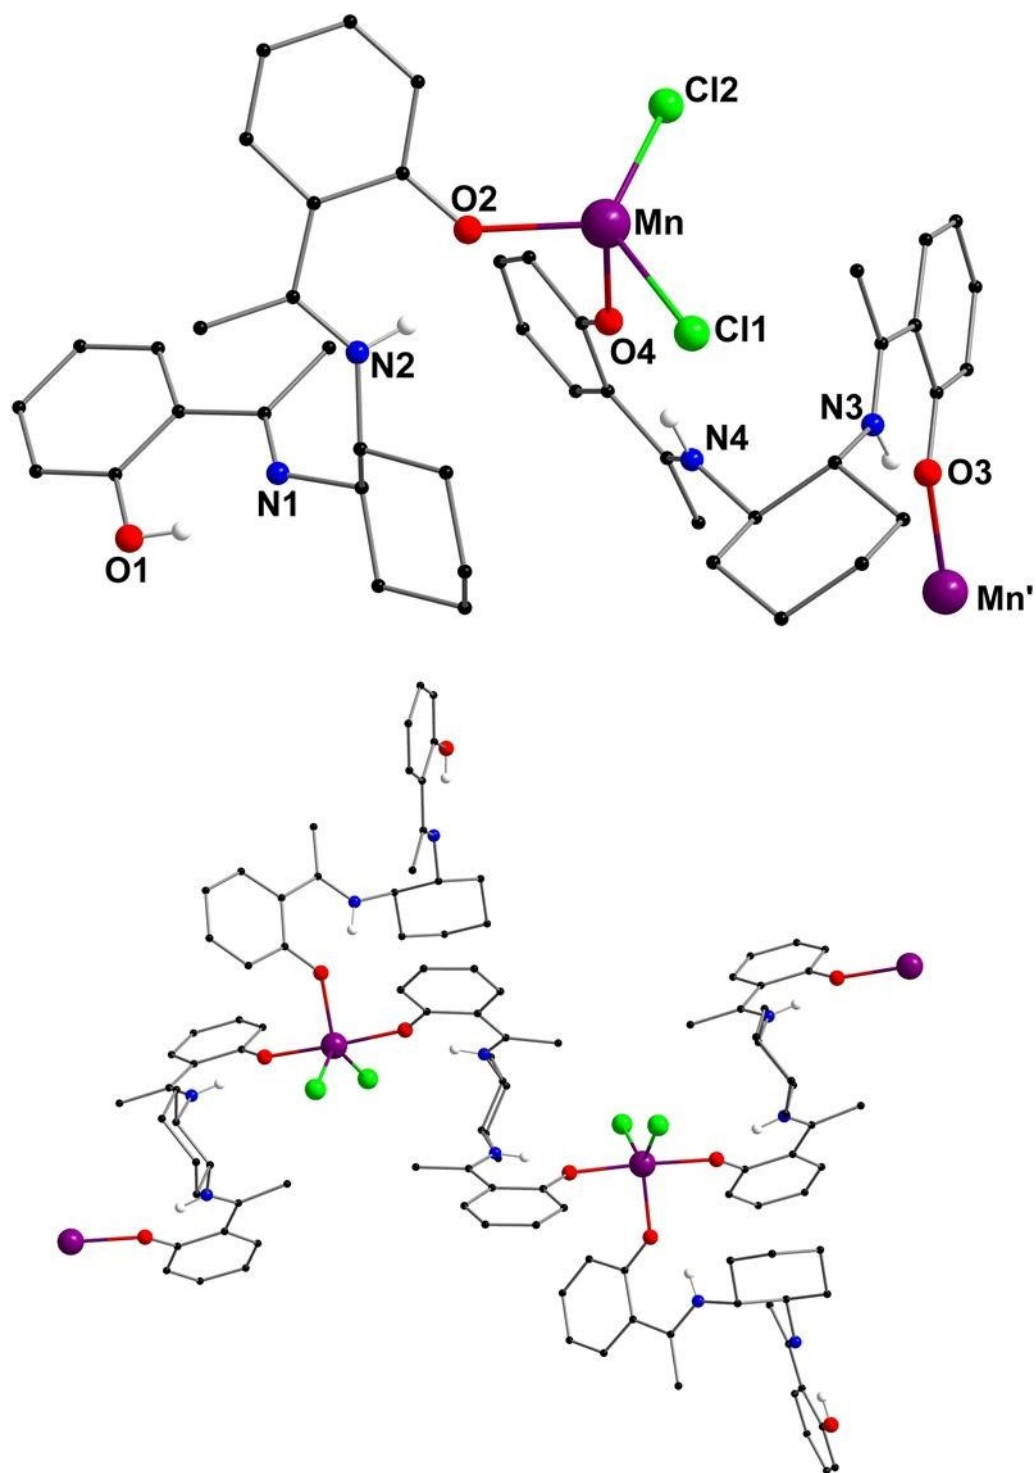

**Fig. S18** (Top) The asymmetric unit and (bottom) a small portion of the 1-D chain of  $\{[\text{Mn}^{\text{II}}\text{Cl}_2(\text{LH}_2)_2] \cdot 3\text{MeOH}\}_n$ .

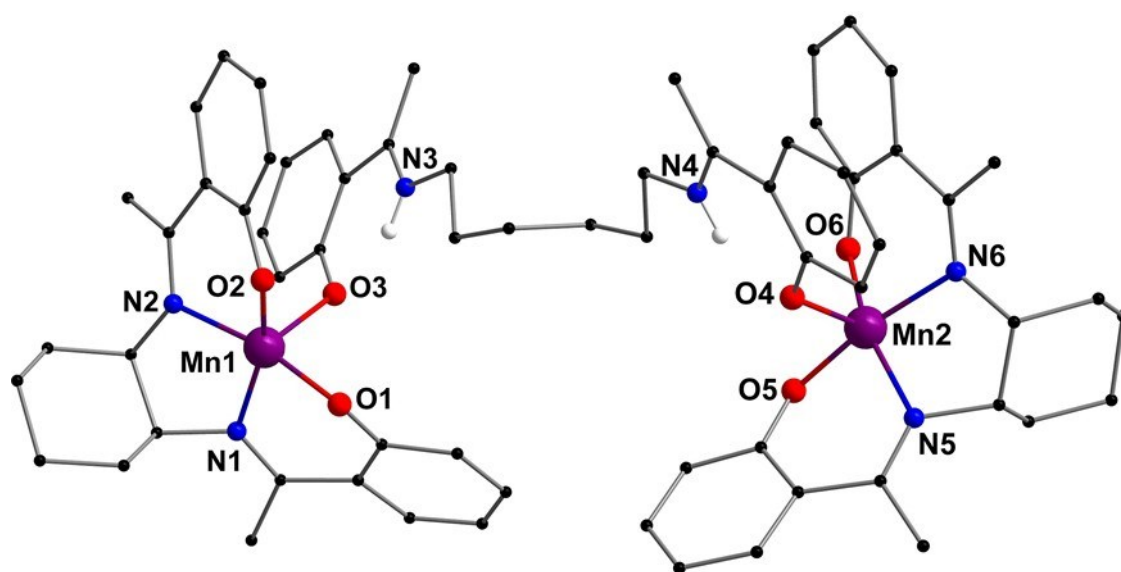

**Fig. S19** Structure of the dinuclear anion that is present in the crystal structure of  $(\text{Et}_3\text{NH})[\text{Mn}^{\text{III}}_2(\text{L})_2(\text{L}'\text{H}_2)](\text{ClO}_4)_3 \cdot \text{CHCl}_3$ ; the anion contains both the doubly deprotonated form ( $\text{L}^{2-}$ ) of the initially used ligand  $\text{LH}_2$  and the neutral bridging transformed ligand  $\text{L}'\text{H}_2$ .



### Mechanistic discussion and proposals

The Ln<sup>III</sup>-assisted LH<sub>2</sub> => L'H<sub>2</sub> transformation, observed in this work, was totally unexpected. Ring opening of cyclohexane to form *n*-hexane (hydrogenolysis of one C-C bond) requires noble metal-containing catalysts supported on various oxide substrates (*e.g.* Al<sub>2</sub>O<sub>3</sub>, SiO<sub>2</sub>, WO<sub>3</sub>/ZrO<sub>2</sub>, ...) and harsh conditions (temperatures > 200 °C and high H<sub>2</sub> pressures).<sup>1</sup> When we observed the Ln<sup>III</sup>-assisted LH<sub>2</sub> => L'H<sub>2</sub> transformation in **1-11**, our first thought was that the obvious H<sub>2</sub> source was MeOH, one of the solvents used for the preparation of **1-11**. MeOH is a promising hydrogen source and could be the base for a future economy, owing to its low cost, bioreproducibility and high H<sub>2</sub> content (12.5 wt %). However, the dehydrogenation of MeOH is energetically demanding (~ 64 kJ mol<sup>-1</sup>) and it thus requires high temperatures, while there is a high probability for CO formation.<sup>2</sup> Organometallic Rh<sup>III</sup><sup>1a</sup> and Ir<sup>III</sup><sup>1b</sup> catalysts have been recently found to show excellent activity in dehydrogenation of MeOH at room temperature, the substrates being aldehydes and α,β-unsaturated ketones. In a very recent report,<sup>2c</sup> the catalytic utilization of MeOH as a H<sub>2</sub> source for the reduction of different organic compounds, such as nitroarenes, olefins and carbonyl compounds, was described. The key to success of these transformations is the use of a commercially available Pt/C catalyst, which enables the transfer hydrogenation of nitroarenes-to-anilines, alkenes-to-alkanes and aldehydes-to-alcohols using MeOH as both the solvent and H<sub>2</sub> donor; the reactions were performed at 150 °C.

The above mentioned experimental literature led us to propose, in the originally submitted ms, the mechanism shown in Scheme S1 (Scheme 3 of the originally submitted ms), with an alternative representation of the transformation of LH<sub>2</sub> to intermediate **II** being illustrated in Scheme S2 (Scheme 4 of the originally submitted ms).

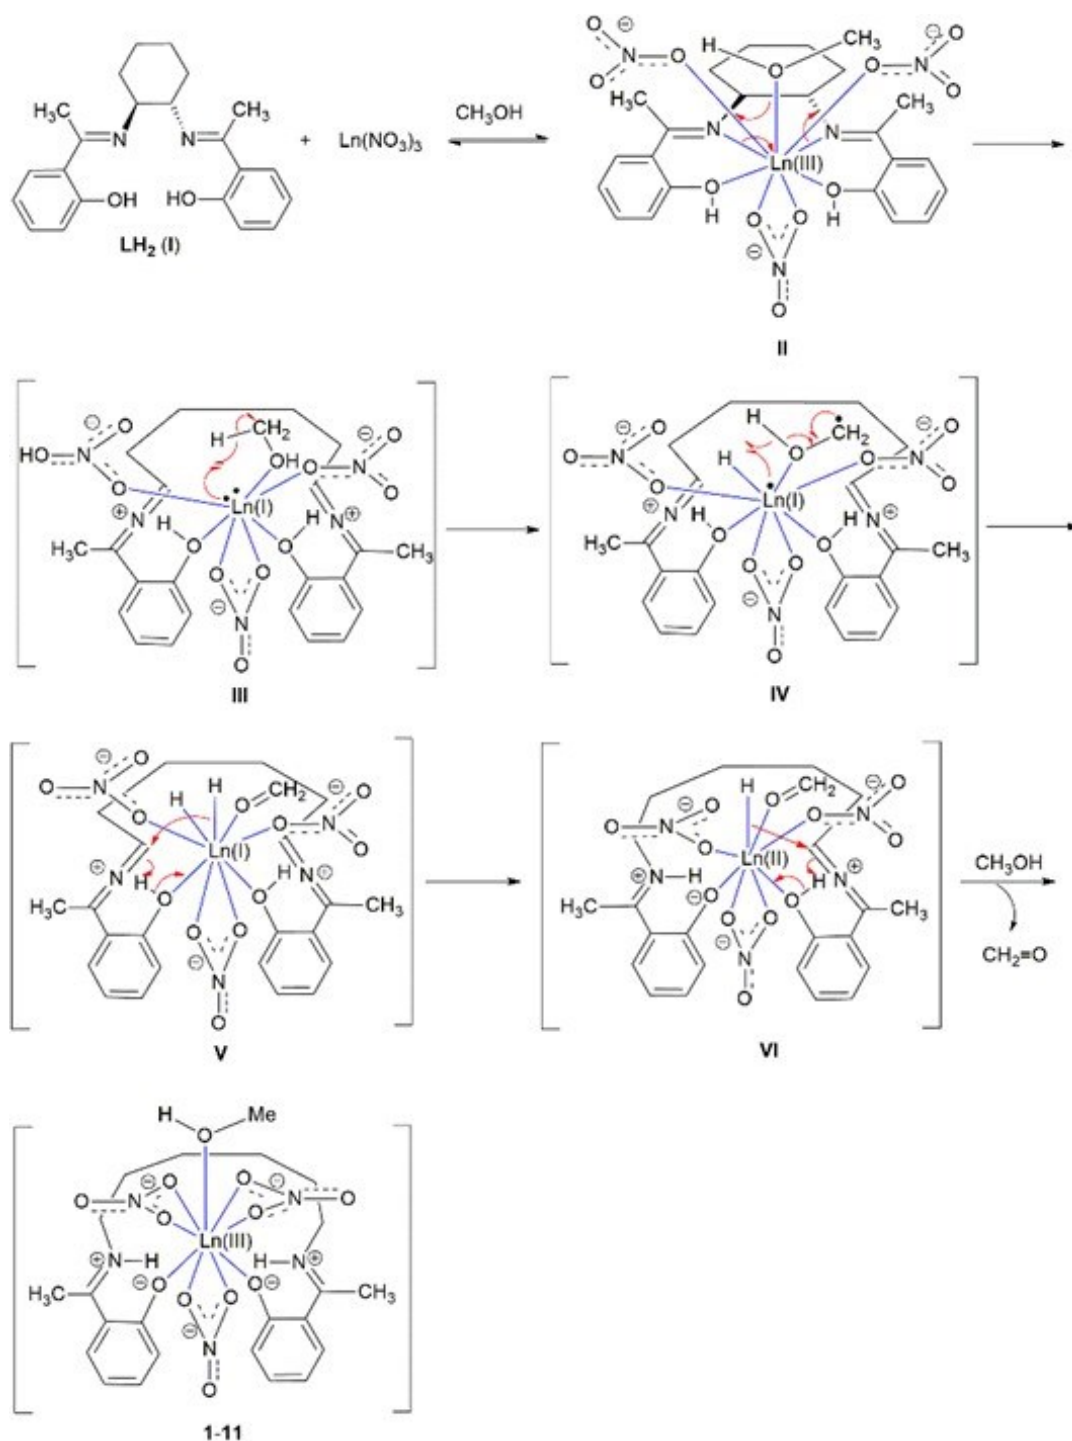

**Scheme S1** Originally proposed mechanism for the  $\text{Ln}^{\text{III}}$ -assisted  $\text{LH}_2 \rightarrow \text{L}'\text{H}_2$  transformation and formation of the final products **1-11**. To avoid congestion, only one of the nitrate groups has been drawn as bidentate chelating in the intermediates **II-VI**. The three nitrate ligands are chelating in the final products (**1-11**) and most probably also in the intermediates **II-VI**.

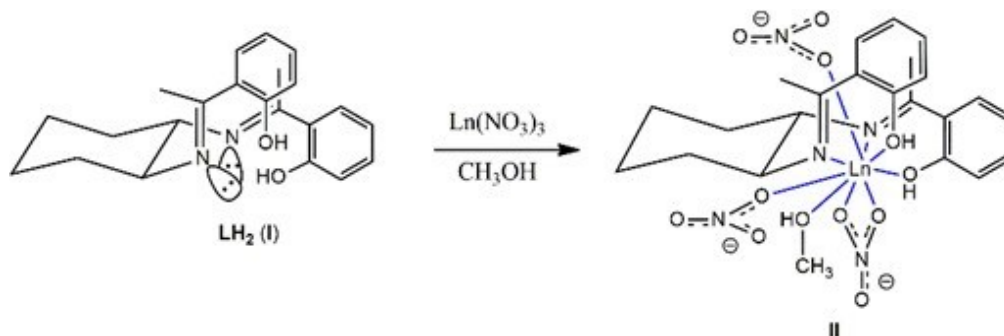

**Scheme S2** Originally proposed, alternative formation of the intermediate complex **II** from the reaction of the original Schiff base  $\text{LH}_2(\text{I})$  and lanthanoid(III) nitrates in MeOH. To avoid congestion, only one of the nitrate groups has been drawn as bidentate chelating.

Of course we were aware that the most peculiar feature of the originally proposed ms (Scheme S1) concerns the low oxidation states (I, II) of the *transient lanthanoid species*. It is well known<sup>3</sup> that the common oxidation state for the lanthanoids is III, but the IV one is also known for Ce, Pr, Nd, Tb and Dy. Relatively recent theoretical and experimental studies have verified the existence of Pr(V) species.<sup>4</sup> The oxidation state II has been found for all lanthanoids,<sup>5</sup> albeit in organometallic compounds. Evidence for the existence of Ln(I) species had been reported,<sup>6a-f</sup> but proof of this was lacking. However, performing a combined photoelectron spectroscopy and quantum theoretical study, a Chinese group<sup>6g,h</sup> showed that the I oxidation state can be stabilized in the boride-cluster species  $[(\text{Ln}^{\text{I}}(\text{B}_4^{2-}))^-]$  and in borazene complexes of the type  $[(\text{Ln}^{\text{I}}(\text{B}_8^{2-}))^-]$ ; these studies proved the existence of the Ln(I) complexes, impressively expanding the chemistry of the 4f metals.

Due to the fact that transient Ln(I) species (Scheme S1) might be highly improbable, we devised the mechanism shown in Scheme S3 below, which was not included in the originally submitted ms. The mechanism (which is essentially similar with that presented in Scheme S1) does not propose Ln(I) species, but only Ln(II).

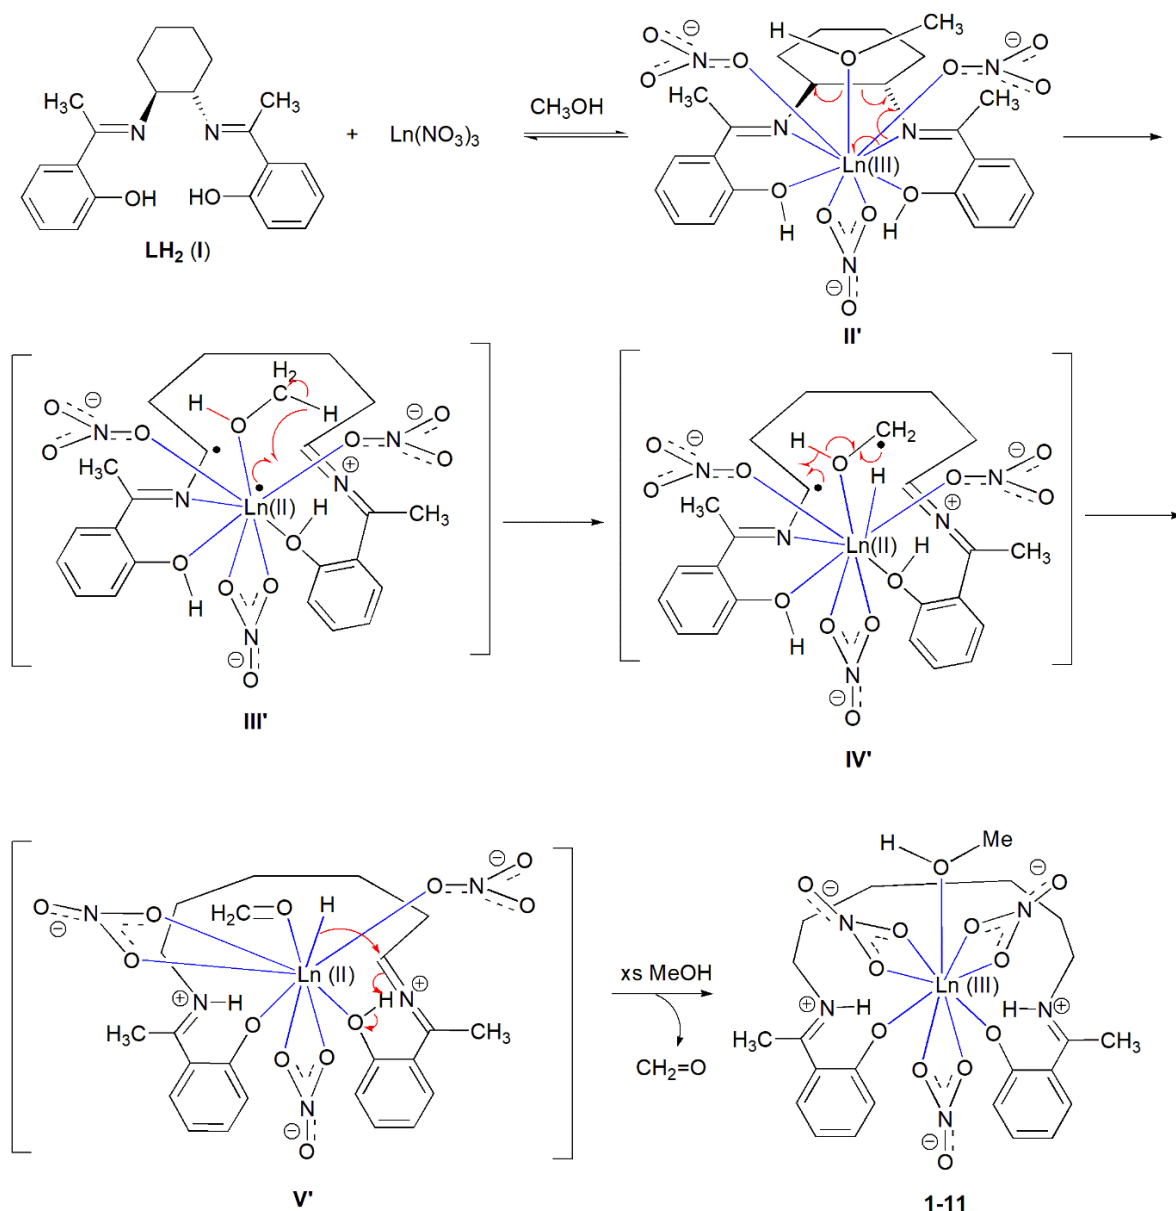

**Scheme S3** An alternative, to that presented in Scheme S1, mechanism for the  $Ln^{III}$ -assisted  $LH_2 \Rightarrow L'H_2$  transformation and formation of the final products **1-11**. This proposal does not involve 2-electron reduction lanthanoid species, but only 1-electron reduction lanthanoid species ; however, this mechanistic proposal does assume (as in Scheme S1) that  $MeOH$  is the  $H_2$  source. To avoid congestion and/or retain the coordination number at the  $Ln^{III}$  atom 8 or 9, only one (in **II'-IV'**) and two (in **V'**) nitrate groups have been drawn as bidentate chelating. The three nitrate groups are chelating in the final products and probably in some intermediates.

However it turned out that the mechanisms presented in Schemes S1-S3 can not be correct. Following the valuable suggestions by Referee 1,<sup>7</sup> we performed the 1:2 reaction of

$Y(NO_3)_3 \cdot 6H_2O$  (in order to use  $^1H$  NMR spectroscopy for the characterization of the product(s)) and  $LH_2$  in other solvents *i.e.* MeCN or  $Me_2CO/CH_2Cl_2$ . Somewhat to our surprise, the obtained solid **11a** (the same in both solvent media) was very similar with product **11**, the only difference being the replacement of the MeOH ligand in the latter by an aqua ligand in the former (analytical, IR and  $^1H$  NMR evidences), please see “Synthetic procedures” in the “Experimental section” of the revised main text. *This proves that MeOH is not the  $H_2$  source in the  $Ln^{II}$ -assisted transformation  $LH_2 \Rightarrow L'H_2$ .*

Also, following Referee’s 1 suggestion: (a) We obtained immediately the same products (in the form of crystalline powders) employing concentrated solutions of the reactants, possibly indicating that the transformation proceeds into the solution and is not a result of the crystallization process ; and (b) We re-examined carefully the 1:1 reactions and found negligible yields of the products.

In order to further confirm the non-involvement of MeOH in the mechanism of the transformation, we also isolated product  $[Y(NO_3)_3(L'H_2)(CD_3OD)]$  (**11b**), see “Synthetic procedures” in the “Experimental section” of the revised main text. Its  $^1H$  NMR spectrum in  $d_6$ -DMSO is almost identical with that of **11**. Again the intergrations of the  $\delta$  3.58, 1.64 and 1.50-1.30 ppm signals, due to the  $-(CH_2)_6-$  protons, is 1:1:1 (or 4:4:4). If MeOH was involved in the mechanism (Schemes S1 and S3), the methylene groups attached to N atoms in the deuterated product would have been  $-CHD-$  (and not  $N(CH_2)$ ) and the intergration ratio would have been 2:4:4. In other words, if MeOH is the  $H_2$  source, two of its H atoms should be expected to be incorporated into the final products, and in particular into the methylene groups next to the N atoms and thus D atoms should be found in the deuteriated complex.

All the above experimental facts, clearly point out a mechanism where a second  $LH_2$  molecule is the source of  $H_2$ . Our mechanistic proposal is illustrated in Scheme S4.

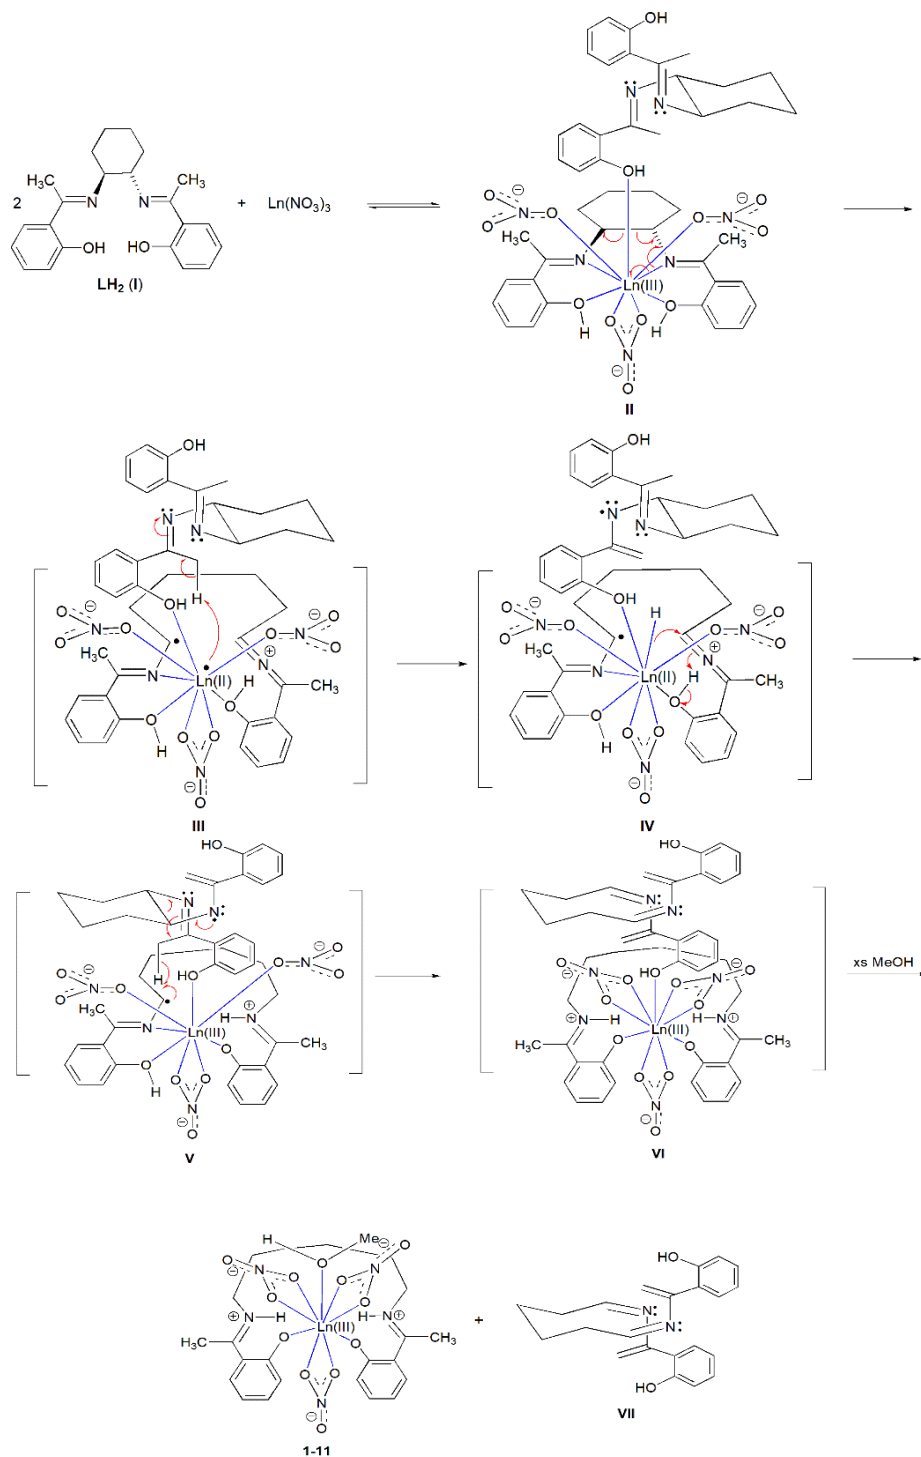

**Scheme S4** Proposed mechanism for the  $\text{Ln}^{\text{III}}$ -assisted  $\text{LH}_2 \Rightarrow \text{L}'\text{H}_2$  transformation and formation of **1-11**. To avoid congestion and/or retain the coordination number at the  $\text{Ln}^{\text{III}}$  atom 8 or 9, only one of the three nitrato groups has been drawn as bidentate chelating ligand in the intermediates II-V. Note that all three nitrato groups are bidentate chelating in the final products (**1-11**).

Thus, the reaction of the  $\text{LH}_2(\text{I})$  with  $\text{Ln}(\text{NO}_3)_3 \cdot x\text{H}_2\text{O}$  ( $x=5$  or  $6$ ) in the 2:1 ratio to form complexes **1-11** through cyclohexyl C-C bond cleavage is proposed to take place as follows, taking into consideration the crucial role of the two  $-\text{CH}_3$  groups on the ligand. The methyl groups are not present in the corresponding ligand  $\text{salcnH}_2$  (Scheme 1 of the originally submitted and revised ms), which upon reaction with lanthanoid (III) ions provide complexes in which the ligand remains always intact.<sup>8</sup> Initial formation of **II** between two molecules of  $\text{LH}_2$ , one acting as tetradentate ligand and the other as monodentate ligand (such coordination behaviours have been observed in  $\text{Ln}^{\text{III}}$  complexes of  $\text{salcnH}_2$ <sup>8d,h</sup>) and the  $\text{Ln}(\text{NO}_3)_3$  unit, followed by an one-electron oxidative glycol cleavage-type of the cyclohexyl C-C bond,<sup>9,10</sup> leads to the new complex **III** with  $\text{Ln}^{\text{III}} \Rightarrow \text{Ln}^{\text{II}}$  reduction and the simultaneous creation of an allylic-type secondary C-centered free radical. An alternative representation of  $\text{LH}_2$  (**I**) to **II** is shown in Scheme S5. Complex **II** is crowded and therefore the driving force behind the subsequent C-C bond cleavage is probably the release of steric strain. The next step involves transfer of an allylic-type H atom from the  $-\text{CH}_3$  group to  $\text{Ln}^{\text{II}}$  leading to the  $\text{Ln}^{\text{II}}$  hydride complex **IV** and a N-centered free radical. Reduction of the bisiminium functionality with the adjacent double bonds by the hydride converts intermediate **IV** to the biradical intermediate **V**. The C-centered free radical is then reduced by a second H atom transfer from the  $-\text{CH}_3$  group of the monodentate ligand in the way depicted in Scheme S4 to give the new intermediate **VI**. Excess MeOH, used as co-solvent in the reaction, displaces then the monodentate ligand to provide the final complexes **1-11**.

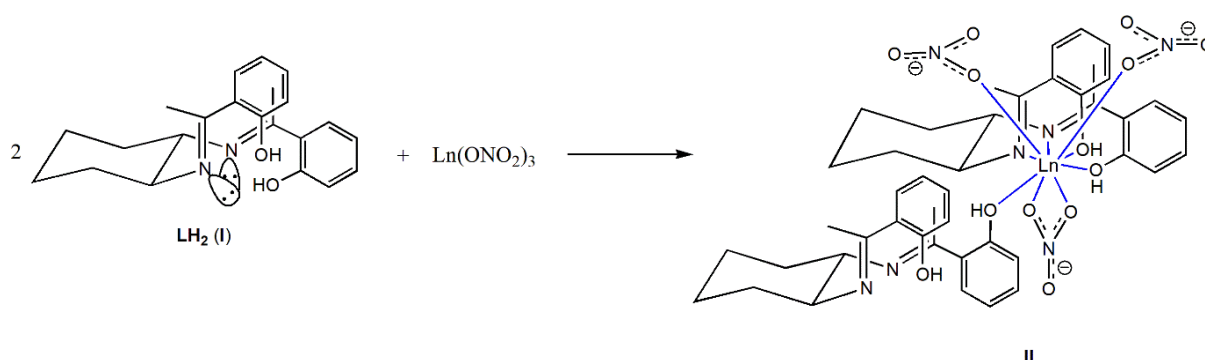

**Scheme S5** Formation of the intermediate complex **II** (see Scheme S4) from the 2:1 reaction between  $\text{LH}_2$  and lanthanoid(III) nitrates. To avoid congestion and/or retain the coordination number at the  $\text{Ln}^{\text{III}}$  centre 9, only one of the three nitrate groups has been drawn as bidentate chelating ligand.

Alternatively, the conversion of the intermediate **V** to intermediate **VI** can be envisaged to take place through the mediation of the metal centre as depicted in Scheme S6.

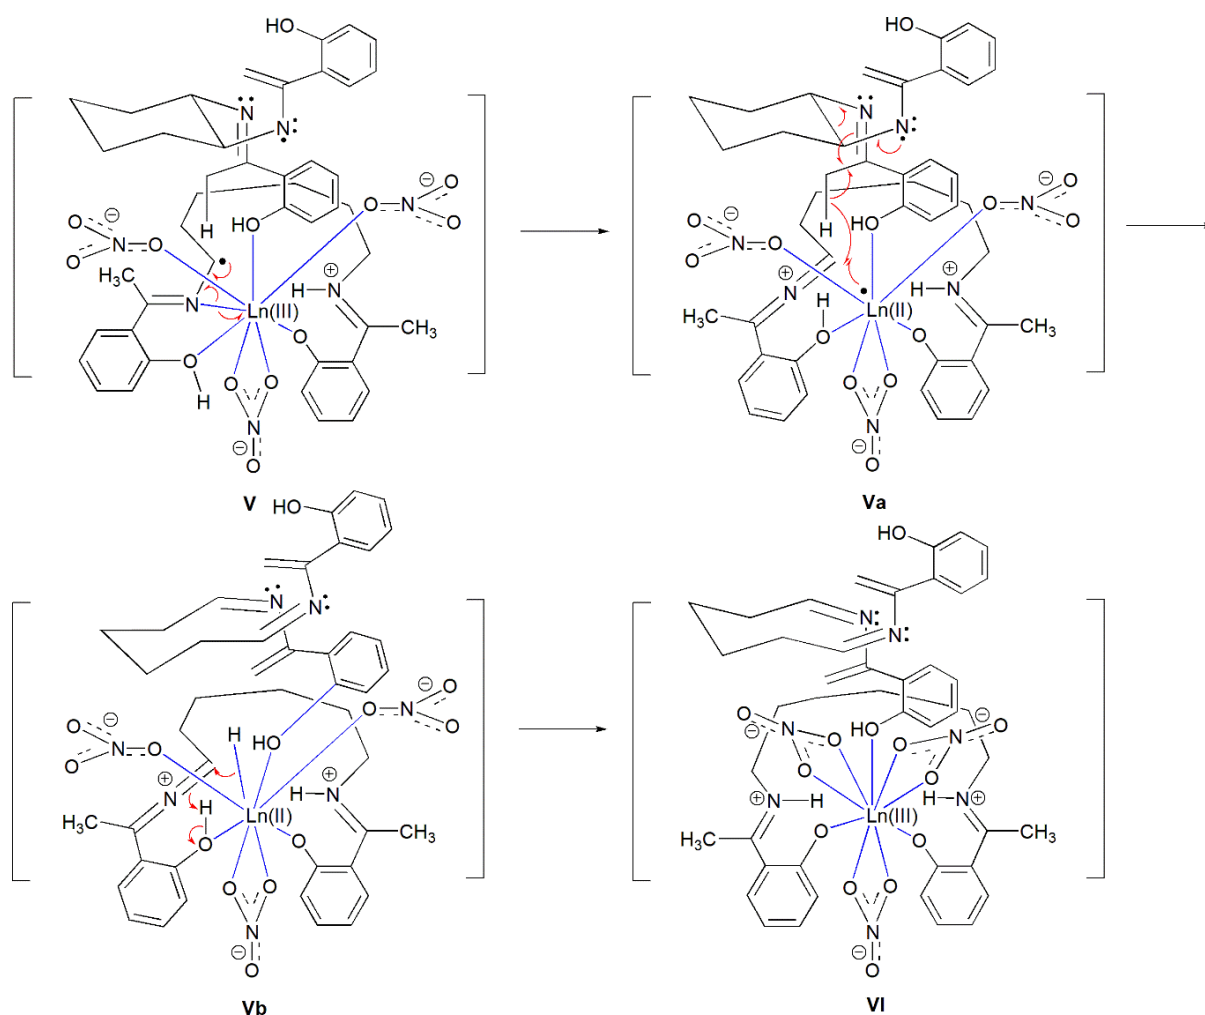

**Scheme S6** Alternative steps for the conversion of intermediate **V** *en route* to the formation of complexes **1-11**.

Two further mechanistic points deserve discussion. First, the 1:2 reaction between  $Y(\text{NO}_3)_3 \cdot 6\text{H}_2\text{O}$  and  $\text{LH}_2$  in  $\text{MeOH}-\text{CH}_2\text{Cl}_2$  under a nitrogen atmosphere (albeit with solvents used as received commercially) led again to complex **11** (IR evidence), suggesting that atmospheric oxygen is not involved in the mechanism (this point was raised by Referee 2<sup>7</sup>). Second, the nitrate could be the primary oxidant (and not  $\text{Ln}^{\text{III}}$ ) in the process.<sup>11,12</sup> In such a case, the nitrite produced in the reaction would be reoxidized to nitrate by  $\text{O}_2$  in the presence of  $\text{Ln}^{\text{III}}$ . Such a possibility can be excluded in our case. The 1:2 reaction between  $\text{YCl}_3 \cdot 6\text{H}_2\text{O}$  (*i.e.* a non-nitrate starting material) and  $\text{LH}_2$  in  $\text{MeOH}-\text{CH}_2\text{Cl}_2$  gave a solid satisfactorily analyzed as



$[\text{YCl}_3(\text{L}'\text{H}_2)(\text{MeOH})_y]$  ( $y = 3$  or  $4$ ) ; its  $^1\text{H}$  NMR spectrum in  $d_6$ -DMSO is identical with that of the nitrate complex **11**. This shows that the nitrates are not essential for the transformation.

### Theoretical discussion in brief

A first theoretical approach for the ligand transformation has been attempted with the goal to understand the great thermodynamic stability of  $[\text{Pr}(\text{NO}_3)_3(\text{L}'\text{H}_2)(\text{MeOH})]$  (**1**), and hence that of the other complexes (**2-12**). The structures of the obtained complex **1** (in which the ligand has been transformed) and the hypothetical complex  $[\text{Pr}(\text{NO}_3)_3(\text{LH}_2)(\text{MeOH})]$  (**1'**) were computationally found and shown in Scheme S7. Complex **1'** consists of a 9-coordinate  $\text{Pr}^{\text{III}}$  atom, with one coordinated molecule of MeOH, three bidentate chelating nitrate groups and one O, O'-bidentate chelating bis(zwitterionic) molecule of the initially used  $\text{LH}_2$  compound as ligand ; it is thus structurally similar with **1**.

It is worth mentioning at this point more specifically the changes observed during the reaction, but also the way in which they should be simulated. The cyclohexyl ring was broken, and it turned into an open carbon chain at the ends of which two more H atoms were added. Therefore, a reasonable simulation of the observed transformation would be the conversion of an 1,2-diaminocyclohexane to an 1,6-diaminohexane model molecule, as shown in Scheme S8. The energy difference ( $\Delta G$ ) between these two model molecules should be added to the energy of the hypothetical complex **1'**, before comparing it with that of the prepared (obtained) complex **1**.

As can be easily seen in Scheme S7, the prepared complex **1** (a) exhibits an extended structure in space (due to the cleavage of the cyclohexyl ring and the creation of the corresponding open  $-(\text{CH}_2)_6-$  chain) by contrast with the hypothetical **1'** (b) which exhibits a more compact structure. This reduces the intramolecular repulsions in the former, increasing them in the latter. This, in turn, could lead to a better thermodynamic stabilization of **1** than of **1'** ; the corresponding energy difference ( $\Delta G$ ) was calculated to be 26.8 kcal/mol.

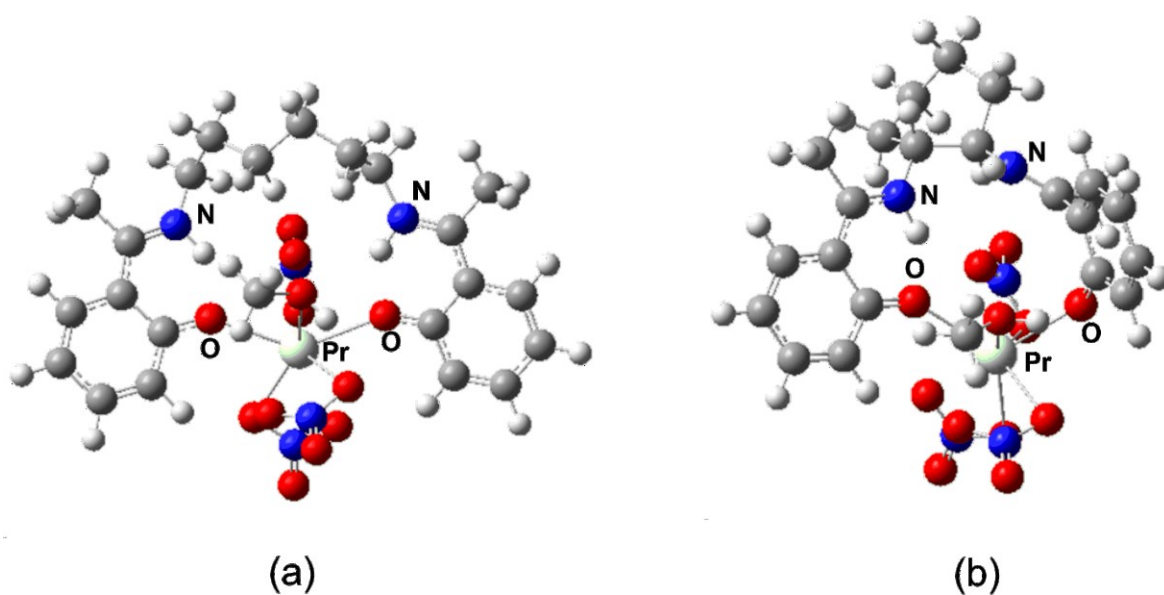

**Scheme S7** Gas-phase calculated structures of the prepared complex **1** (a) and the hypothetical complex **1'** (b). Symbols of a few atoms are only given for clarity, such as i) the two adjacent N atoms attached to the cyclohexane ring in **b**, which are significantly removed by ring opening in **a**, and ii) the O atoms of the organic ligands coordinated to Pr<sup>III</sup>.

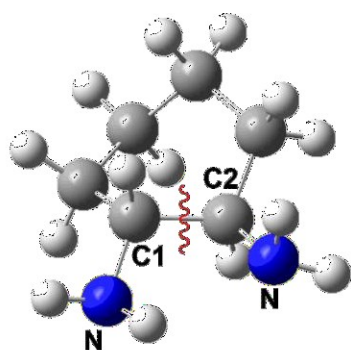

1,2-diaminocyclohexane

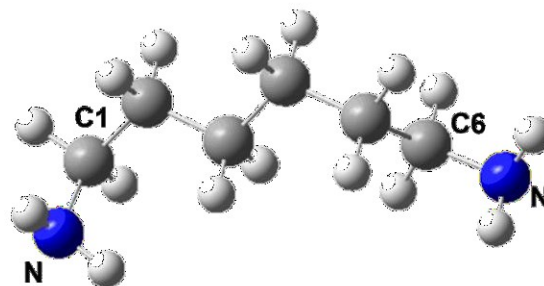

1,6-diaminohexane

**Scheme S8** The computational structures of the model molecules 1,2-diaminocyclohexane (left) and 1,6-diaminohexane.

## References for the ESI

1. (a) Y. Miki, S. Yamadaya and M. Oba, *J. Catal.*, 1977, **49**, 278-284; (b) L.M. Kustov, T.V. Vasina, O.V. Masloboishchikova, E.G. Khelkovskaya-Sergeeva and P. Zeuthen, *Stud. Surf. Sci. Catal.*, 2000, **130**, 227-232; (c) O.V. Masloboishchikova, T.V. Vasina, E.G. Khelkovskaya-Sergeeva, L.M. Kustov and P. Zeuthen, *Russ. Chem. Bull., Intern. Edit.*, 2002, **51**, 249-254; (d) T.V. Vasina, O.V. Masloboishchikova, E.G. Khelkovskaya-Sergeeva, L.M. Kustov and P. Zeuthen, *Russ. Chem. Bull., Intern. Edit.*, 2002, **51**, 255-258.
2. (a) Z. Chen, G. Chen, A.H. Aboo, J. Iggo and J. Xiao, *Asian J. Org. Chem.*, 2020, **9**, 1174.; (b) N. Garg, H.P. Somasundharam, P. Dahiya and B. Sundararaju, *Chem. Commun.*, 2022, **58**, 9930-9933; (c) V. Goval, T. Bhatt, C. Dewangan, A. Narani, G. Naik, E. Baharaman, K. Natte and R.V. Jagadeesh, *J. Org. Chem.*, 2023, **88**, 2245–2259.
3. H.C. Aspinall, *f-Block Chemistry*, Oxford University Press, Oxford, UK, 2020, pp. 13-14, 28-32.
4. (a) S.-X. Hu, J. Jian, J. Su, X. Wu, J. Li and M. Zhou, *Chem. Sci.*, 2017, **8**, 4035-4043; (b) Q. Zhang, S.-X. Hu, H. Qu, J. Su, G. Wang, J.-B. Lu, M. Chen, M. Zhou and J. Li, *Angew. Chem., Int. Ed.*, 2016, **55**, 6896-6900.
5. For example, see: (a) W.J. Evans, *Inorg. Chem.*, 2007, **46**, 3435-3449; (b) A.J. Ryan, L.E. Darago, S.G. Balasubramani, G.P. Chen, J.W. Ziller, F. Furche, J.R. Long and W.J. Evans, *Chem.- Eur. J.*, 2018, **24**, 7702-7709; (c) G. Meyer, *Angew. Chem., Int. Ed.*, 2014, **53** 3550-3551; (d) M.N. Bochkarov, *Coord. Chem. Rev.*, 2004, **248**, 835-851; (e) P.B. Hitchcock, M.F. Lappert, L. Maron and A.V. Protchenko, *Angew. Chem., Int. Ed.*, 2008, 1488-1491.
6. (a) F.K. Fong, J.A. Cape and E.Y. Wong, *Phys. Rev.*, 1966, **151**, 299-303; (b) F.K. Fong, J.B. Fenn, Jr. and J.O. McCaldin, *J. Chem. Phys.*, 1970, **53**, 1559-1565; (c) G. Schoendorff and A.K. Wilson, *J. Chem. Phys.*, 2014, **140**, article 224314; (d) R.S. Ram and P.F. Bernath, *J. Chem. Phys.*, 1996, **104**, 6444-6451; (e) X. Cao,

- W. Liu and D. Michael, *Sci. China, Ser. B*, 2002, **45**, 91-96; (f) J. Zhang, G. Pagano, P.W. Hess, A. Kyprianidis, P. Becker, H. Kaplan, A.V. Gorshkov, Z.X. Gong and C. Monroe, *Nature*, 2017, **551**, 601-609; (g) X. Chen, T.-T. Chen, W.-L. Li, J.-B. Lu, L.-J. Zhao, T. Jian, H.-S. Hu, L.-S. Wang and J. Li, *Inorg. Chem.*, 2019, **58**, 411-418.
7. We thank the referees for their valuable revision points/comments/suggestions.
8. (a) G.-L. Wang, Y.-M. Tian, D.-X. Cao, Y.-S. Yu and W.-B. Sun, *Z. Anorg. Allg. Chem.*, 2011, **637**, 583-588; (b) G.-L. Wang, Y.-M. Tian, W.-B. Sun, B.-L. Han, M.-F. Yu, H. Xu and T. Gao, *Z. Anorg. Allg. Chem.*, 2011, **637**, 1616-1621; (c) J. Zhu, H.-F. Song, P.-F. Yan, G.-F. Hou and G.-M. Li, *Cryst. Eng. Commun.*, 2013, **15**, 1747-1752; (d) Q. Liu, M. Ding, Y. Lin and Y. Xing, *Polyhedron*, 1998, **17**, 555-559; (e) Q. Liu and M. Ding, *J. Organomet. Chem.*, 1998, **553**, 179-181; (f) Q. Liu, J. Huang, Y. Qian and A.S.C. Chan, *Polyhedron*, 1999, **18**, 2345-2350; (g) J. Zhu, H. Song, J. Sun, P. Yan, G. Hou and G. Li, *Synth. Metals*, 2014, **192**, 29-36; (h) P.-F. Yan, P.-H. Lin, F. Habib, T. Aharen, M. Murugesu, Z.-P. Deng, G.-M. Li and W.-B. Sun, *Inorg. Chem.*, 2011, **50**, 7059-7065; (i) J.-W. Sun, J. Zhu, H.-F. Song, G.-M. Li, X. Yao and P.-F. Yan, *Cryst. Growth Des.*, 2014, **14**, 5356-5360; (j) X. Zou, C. Du, Y. Dong and G. Li, *Inorg. Chim. Acta*, 2020, **507**, article 119455.
9. W. S. Trahanovsky, L. H. Young and M.H. Bierman, *J. Org. Chem.*, 1969, **34**, 869-871.
10. J. March, *Advanced Organic Chemistry*, Wiley, New York, USA, 4<sup>th</sup> edn, 1992, pp. 1174-1177.
11. G. A. Molander, *Chem. Rev.*, 1992, **92**, 29-68.
12. P. Girard and H. B. Kagan, *Tetrahedron Lett.*, 1975, 4513-4515.



**Author contributions**

I.M.-M.: conceptualization, synthesis and data analysis; Z.L.: Raman spectroscopy and data analysis; A.K.: synthesis and conventional characterization; D.M.: synthesis and conventional characterization; K. Skordi: collection of single-crystal crystallographic data; A.T.: supervision of the experimental work on single-crystal crystallography; V.B.: luminescence spectra and data analysis; A.E.: supervision of the experimental magnetic work; J.M. magnetic measurements, data analysis and writing the magnetic part of the manuscript; V.N.: solution and refinement of the single-crystal X-ray structures and creation of structural plots; E.B.: theoretical calculations and writing the relevant part of the manuscript; D.P.: mechanistic proposals and writing the relevant part of the manuscript; and S.P.: conceptualization, supervision, project management, and final manuscript writing and editing.
